# Supplementary material
Source: HighWire-hosted journal article supplement (http://www.cmaj.ca/highwire/filestream/148385/field_highwire_adjunct_files/0/221387-image-1-at.pdf)
Supplement: 221387-image-1-at.pdf [file 221387-image-1-at.pdf]

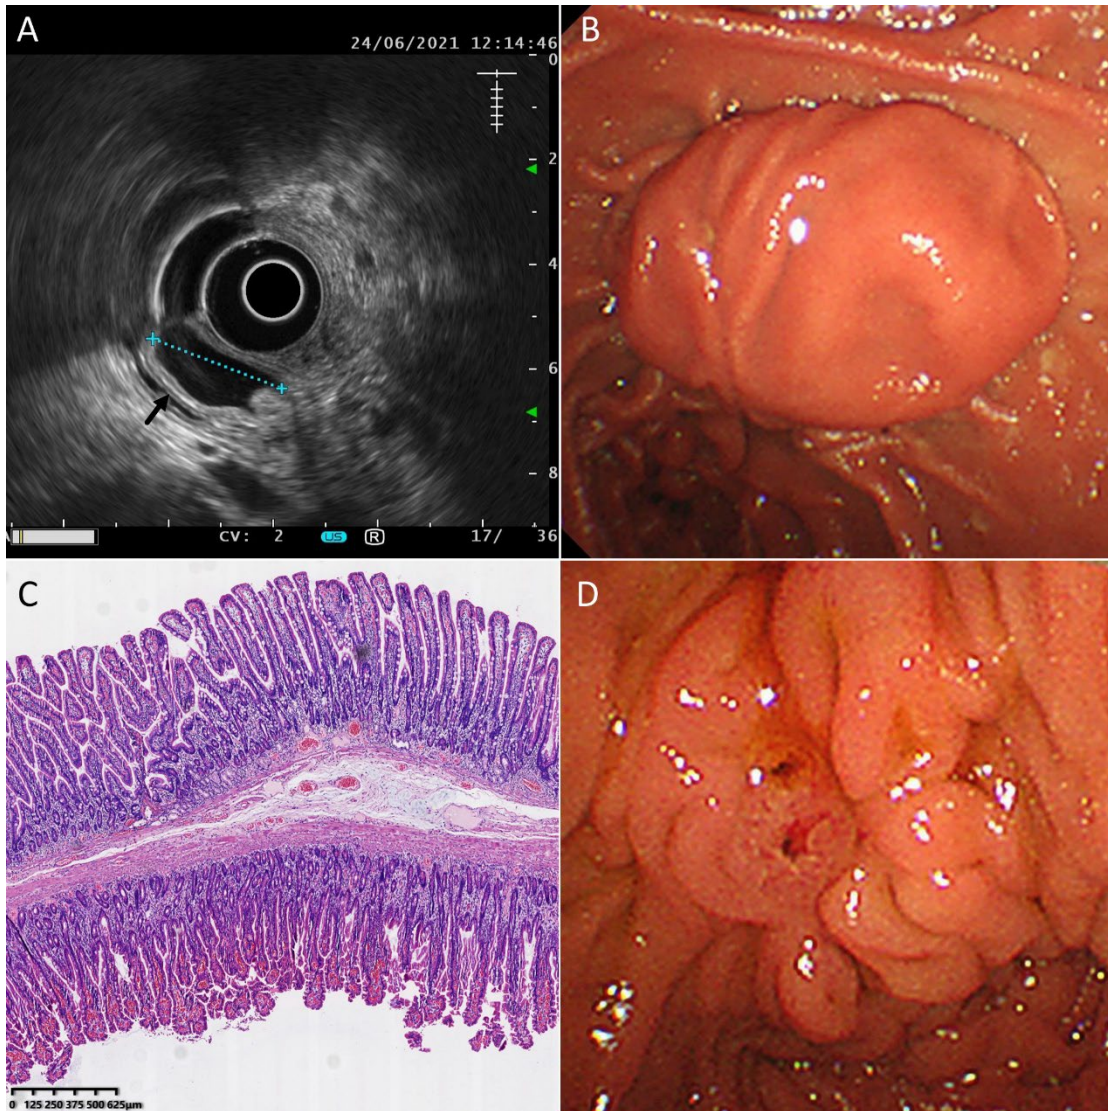

- A. Endoscopic ultrasonography (EUS) revealed a unilocular and anechoic lesion located in the submucosal layer, and the cyst wall consisted of 5 layers (arrow).
- B. Duodenoscopy revealed a large submucosal lesion at the ampulla of Vater, and peristalsis of the cyst wall was observed.
- C. Histopathological examination of the lesion revealed that both the inner and outer walls of the cyst were lined by duodenal mucosa epithelium and contained a distinct layer of smooth muscle.
- D. The orifices of the bile duct and pancreatic duct were separate at an endoscopic re-examination at 3 months.
